# Supplementary material for: Understanding aerosol composition in a tropical inter-Andean valley impacted by agro-industrial and urban emissions
Source: Copernicus journal article supplement (doi:10.5194/acp-22-8473-2022), 2022-07-04
Supplement: Supplementary file 1 [file acp-22-8473-2022-supplement.pdf]

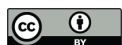

*Supplement of*

## **Understanding aerosol composition in a tropical inter-Andean valley impacted by agro-industrial and urban emissions**

**Lady Mateus-Fontecha et al.**

*Correspondence to:* Rodrigo Jimenez ([rjimenezp@unal.edu.co](mailto:rjimenezp@unal.edu.co))

The copyright of individual parts of the supplement might differ from the article licence.

Table S1. Preliminary PM10 emission estimate in CRV region reported in Ton year.

| Sector                  | Source Emission                                    | Year | Emission<br>(Ton PM10 year <sup>-1</sup> ) | Reference                                                                 |
|-------------------------|----------------------------------------------------|------|--------------------------------------------|---------------------------------------------------------------------------|
| Manufacturing processes | Food and beverage industry                         | 2017 | 6853.81                                    | (CVC and Fulecol, 2018; CVC and K2, 2018b, 2018c, 2018d, 2018a;CVC, 2012) |
| Mobile                  | Traffic                                            | 2017 | 3425.36                                    | (CVC and Fulecol, 2018; CVC and K2, 2018b, 2018c, 2018d, 2018a)           |
| Manufacturing processes | Paper and printing industry                        | 2017 | 2766.9                                     | (CVC and Fulecol, 2018; CVC and K2, 2018a; CVC, 2012)                     |
| Sugarcane burning       | Sugarcane burning                                  | 2018 | 1740.31                                    | (Cardozo et al., 2019)                                                    |
| Manufacturing processes | Power generation, incinerators, and other services | 2017 | 608.39                                     | (CVC and Fulecol, 2018; CVC and K2, 2018c, 2018d, 2018a; CVC, 2012)       |
| Manufacturing processes | Production of cement, asphalt, and tiles           | 2017 | 585.07                                     | (CVC, 2012)                                                               |
| Manufacturing processes | Metallurgical industry                             | 2017 | 260.13                                     | (CVC and Fulecol, 2018; CVC and K2, 2018c)                                |
| Manufacturing processes | Luminaire and battery industry                     | 2012 | 27.37                                      | (CVC, 2012)                                                               |
| Manufacturing processes | Chemistry Industry                                 | 2012 | 27.71                                      | (CVC, 2012)                                                               |
| Manufacturing processes | Leather and textile industry                       | 2012 | 18.27                                      | (CVC, 2012)                                                               |
| Other                   | Other                                              | 2018 | 21.27                                      |                                                                           |

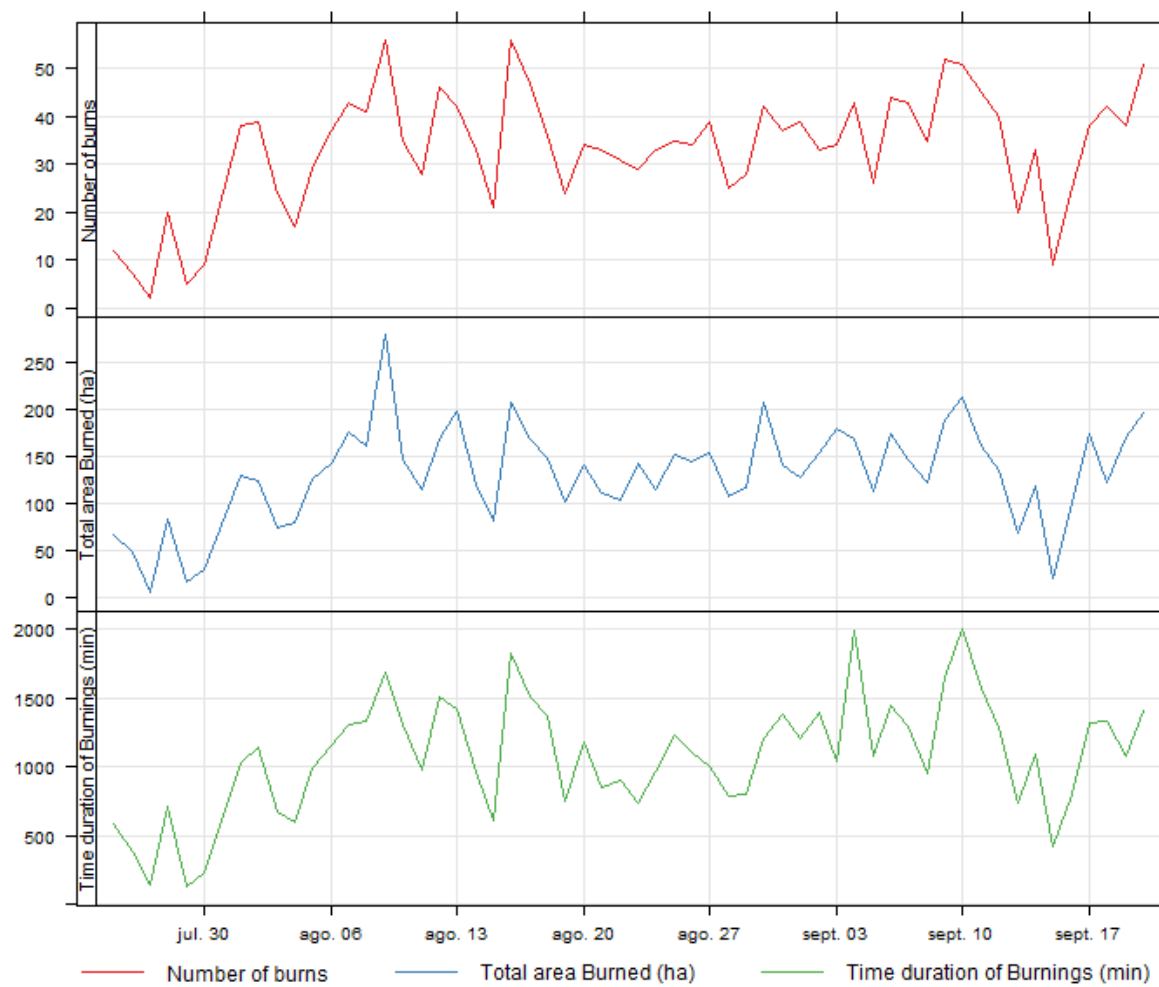

35

Figure S1. Number of preharvest sugarcane burnings registered, area burned and time of those burnings, aggregated by day, happens while this study was conducted (July 25<sup>th</sup> and September 19<sup>th</sup>, 2018).

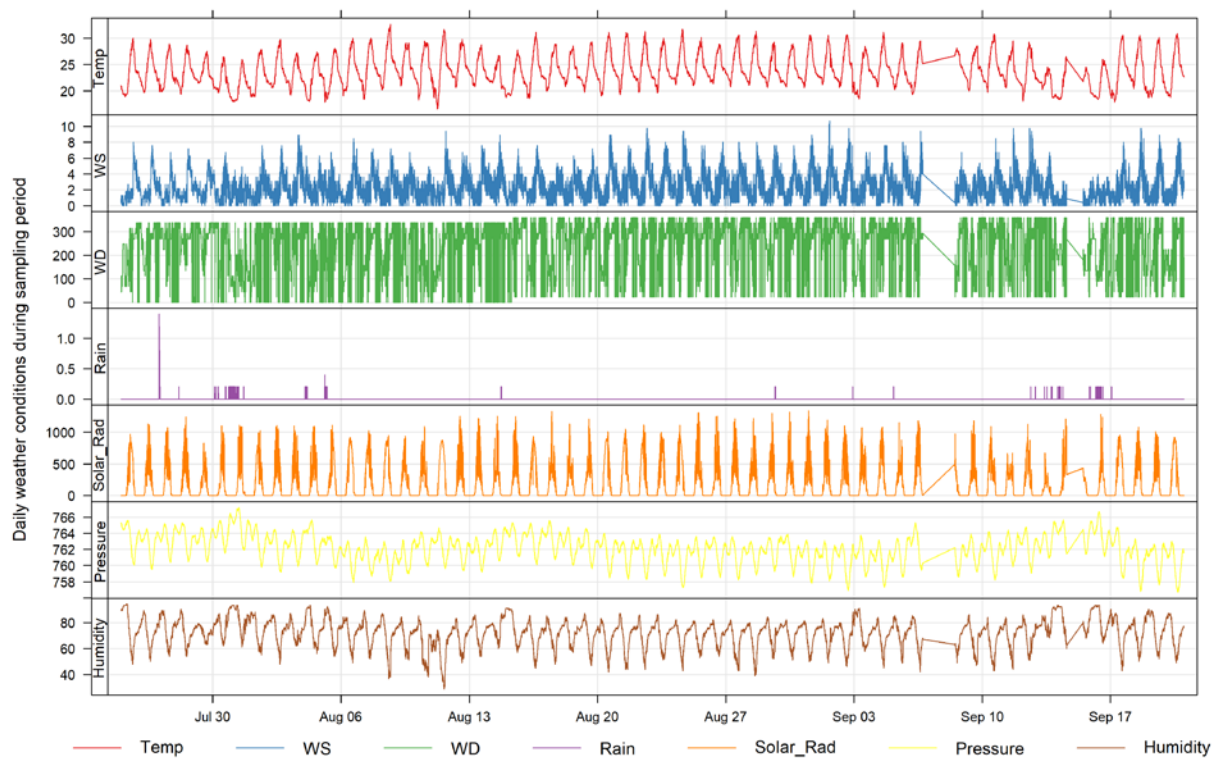

40

Figure S2. Weather conditions during the sampling period in CRV.

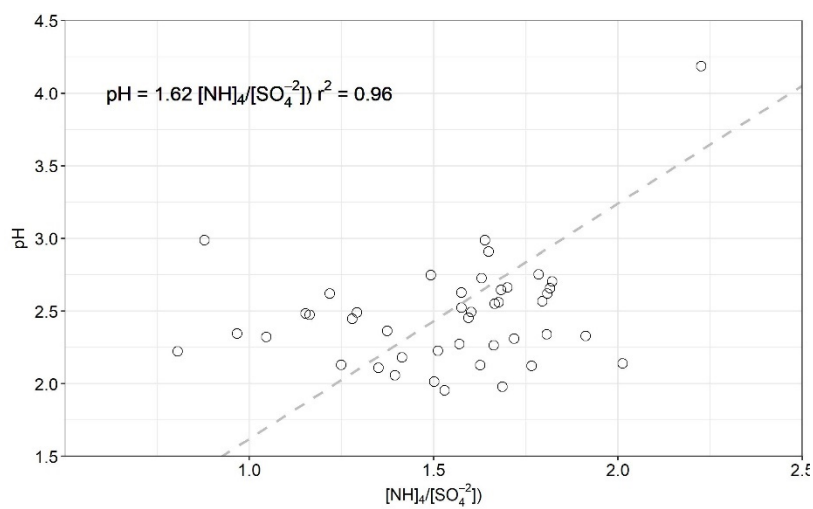

Figure S3. Scatter plot of  $[\text{NH}_4^+]/[\text{SO}_4^{2-}]$  ratio and pH for  $\text{PM}_{2.5}$  samples collected in CRV.

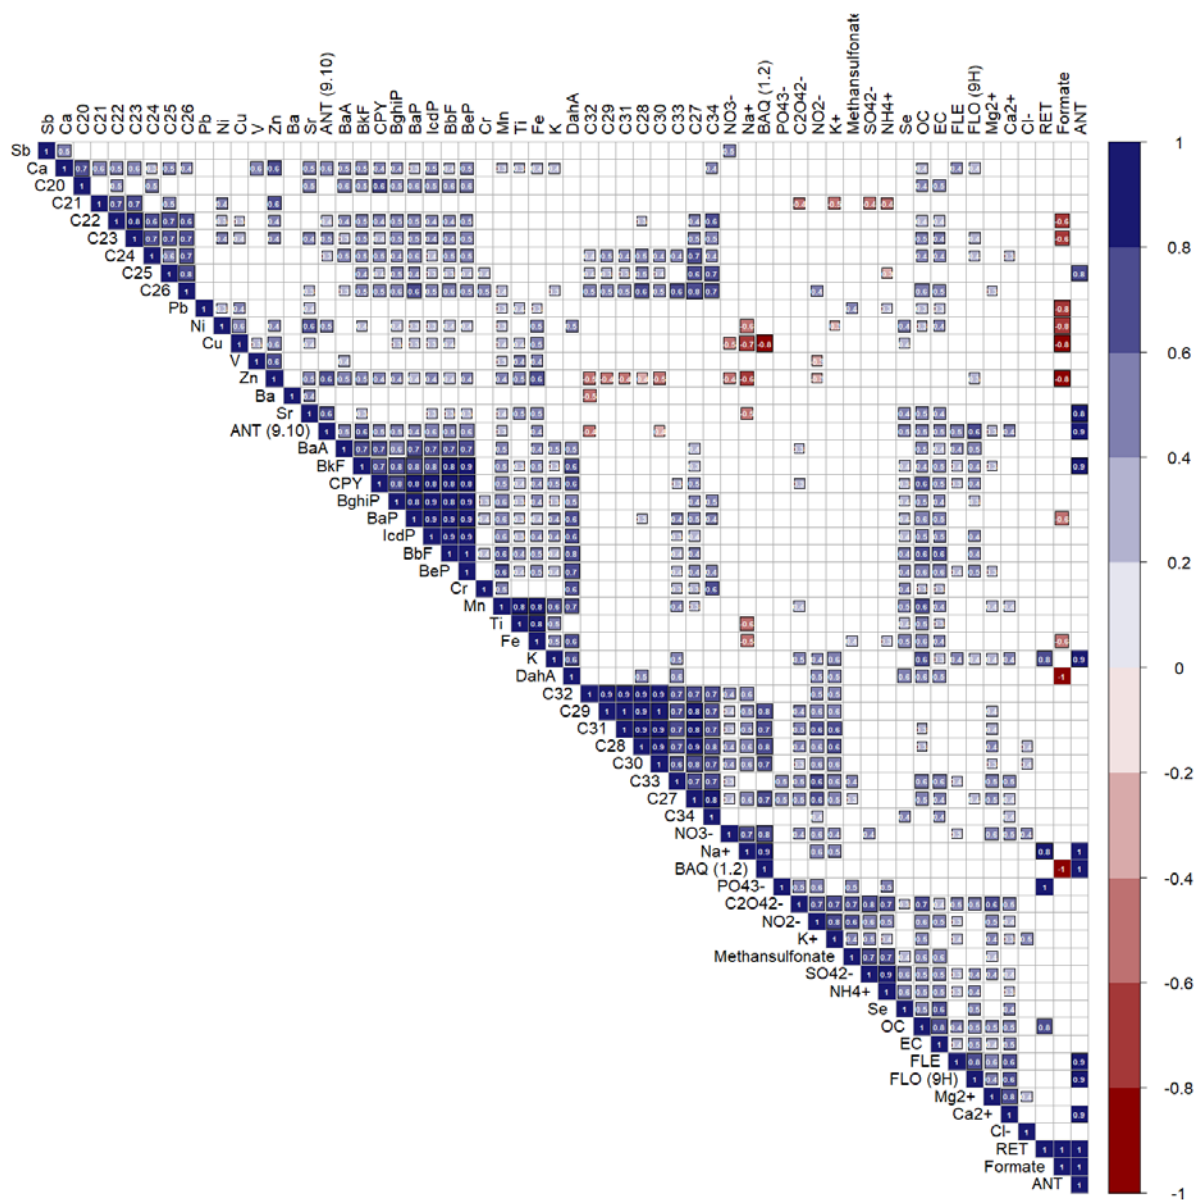

Figure S4. Correlation matrix of chemical compounds. White areas corresponding to correlation with p value > 0.05

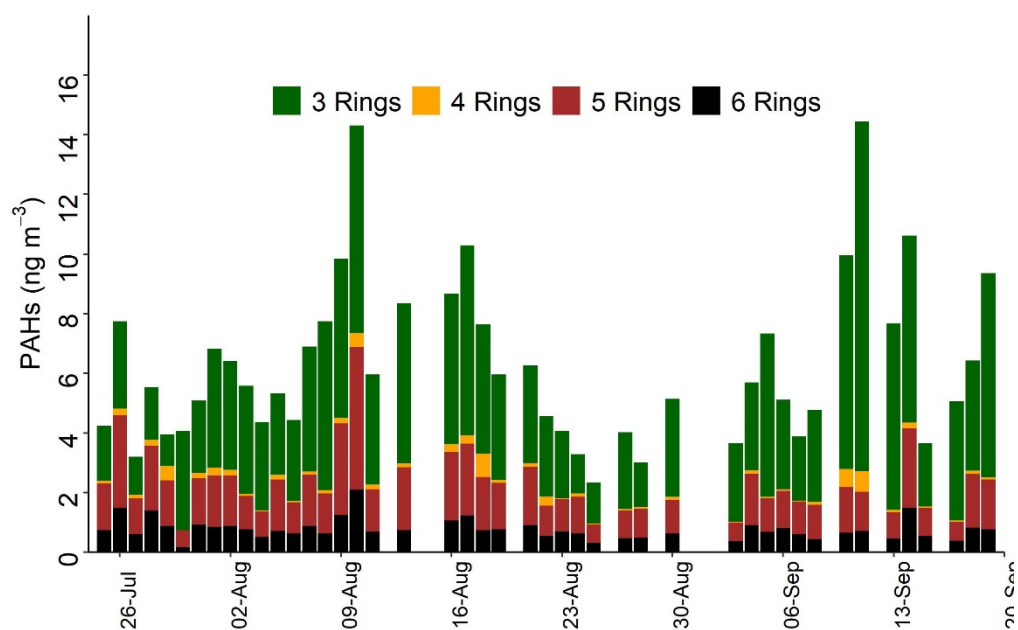

Figure S5. Time series of PAHs in PM<sub>2.5</sub> samples collected in CRV during 2018.

55

60

65

70

Table S2. Mean and one standard deviation concentrations of PAHs measured in the samples of PM<sub>2.5</sub> collected in CRV region, concentrations reported in ng m<sup>-3</sup>.

| PAHs                          | Abbreviation | Rings   | Mean | sd   |
|-------------------------------|--------------|---------|------|------|
| Fluorene                      | FLE          | 3 rings | 2.82 | 1.52 |
| 9 10-Anthracenedione          | ANT (9,10)   | 3 rings | 0.67 | 0.33 |
| Benzo(b)fluoranthene          | BbF          | 5 rings | 0.44 | 0.22 |
| 9H-Fluorenone                 | FLO (9H)     | 3 rings | 0.41 | 0.34 |
| Benzo(ghi)perylene            | BghiP        | 6 rings | 0.40 | 0.17 |
| Cyclopenta(cd)pyrene          | CPY          | 5 rings | 0.38 | 0.21 |
| Indeno(1 2 3-cd)pyrene        | IcdP         | 6 rings | 0.38 | 0.18 |
| Benz(e)pyrene                 | Be P         | 5 rings | 0.28 | 0.13 |
| Benz(a)pyrene                 | BaP          | 5 rings | 0.27 | 0.14 |
| 1,2 Benzantraquinone          | BAQ (1,2)    | 4 rings | 0.21 | 0.15 |
| Phenanthrene                  | PHEN         | 3 rings | 0.19 | 0.18 |
| Anthracene                    | ANT          | 3 rings | 0.08 | 0.18 |
| Benzo(k)fluoranthene          | BkF          | 5 rings | 0.14 | 0.08 |
| Retene                        | RET          | 3 rings | 0.14 | 0.11 |
| Fluoranthene                  | FLT          | 4 rings | 0.13 | 0.08 |
| Pyrene                        | PYR          | 4 rings | 0.12 | 0.05 |
| Benz(a)anthracene             | BaA          | 4 rings | 0.09 | 0.05 |
| Dibenz(ah)Anthracene          | DahA         | 5 rings | 0.06 | 0.03 |
| 2, 2-Binaphthyl               | BNT (2.2)    | 4 rings | 0.03 | 0.05 |
| Chrysene(+Triphenylene)       | CHRY         | 4 rings | 0.02 | 0.03 |
| Benzo(b)naphtho(1 2)thiophene | BNT (2,1)    | 4 rings | 0.01 | 0.01 |
| BaP TEQ                       |              |         | 0.38 | 0.23 |
| BaP MEQ                       |              |         | 0.54 | 0.29 |
| Σ PAH 3 Rings (LMW)           |              |         | 3.3  | 2.09 |
| Σ PAH 4 Rings (MMW)           |              |         | 0.12 | 0.18 |
| Σ PAH 5 Rings (HMW)           |              |         | 1.48 | 0.77 |
| Σ PAH 6 Rings (HMW)           |              |         | 0.72 | 0.35 |
| BeP/(BeP+BaP)                 |              |         | 0.51 | 0.04 |

|                   |      |      |
|-------------------|------|------|
| IcdP/(IcdP+BghiP) | 0.48 | 0.04 |
| BaP/BghiP         | 0.69 | 0.13 |
| IcdP/BghiP        | 0.93 | 0.14 |
| LMW/(MMW+HMW)     | 1.43 | 1.00 |

80 Table S3. Median concentrations and 1 standard deviation of n-alkanes analyzed in PM<sub>2.5</sub> samples collected in CRV (ng/m<sup>3</sup>).

| n-Alkane   | Mean  | sd    |
|------------|-------|-------|
| C20        | 0.34  | 0.17  |
| C21        | 0.30  | 0.29  |
| C22        | 0.51  | 1.08  |
| C23        | 1.14  | 0.83  |
| C24        | 3.03  | 1.68  |
| C25        | 2.96  | 1.08  |
| C26        | 3.40  | 1.30  |
| C27        | 3.06  | 1.15  |
| C28        | 2.68  | 1.41  |
| C29        | 6.35  | 3.41  |
| C30        | 4.22  | 3.31  |
| C31        | 5.87  | 3.37  |
| C32        | 2.53  | 1.58  |
| C33        | 3.15  | 2.64  |
| C34        | 1.10  | 0.61  |
| Σn-alkanes | 40.36 | 18.82 |
| CPI        | 1.22  | 0.18  |
| WAX (%)    | 12.65 | 5.21  |
